# Supplementary material
Source: publisher site journal article supplement (https://www.dovepress.com/get_supplementary_file.php?f=431034.docx)
Supplement: Supplementary file 1 [file get_supplementary_file.php]

**Table S1** Times of antibiotic self-medication among children (N= 396)

| Times | Used(n) | Prevalence Users (%) |
| --- | --- | --- |
| 1 | 144 | 36.4 |
| 2-3 | 195 | 49.2 |
| ≥4 | 57 | 14.4 |

**Table S2** Basis of antibiotic self-medication among children (N= 396)

| Basis | Used(n) | Prevalence Users (%) |
| --- | --- | --- |
| Experience | 11 | 2.8 |
| Drug Description | 303 | 76.5 |
| pharmacist guidance | 78 | 19.7 |
| Other | 4 | 1.0 |

**Table S3** Breakdown of types of antibiotic self-medication among children (N= 396)

| Antibiotics | Used(n) | Prevalence Users (%) |
| --- | --- | --- |
| **Penicillins** | **338** | **85.4** |
| Amoxicillin | 332 | 83.8 |
| Ampicillin | 26 | 6.6 |
| **Cephalosporins** | **296** | **74.7** |
| Cephalexin | 49 | 12.4 |
| Cefazolin | 19 | 4.8 |
| Cefradine | 134 | 33.8 |
| Cefixic | 184 | 46.5 |
| Cefothia | 9 | 2.3 |
| **Macrolides** | **215** | **54.3** |
| Erythromycin | 53 | 13.4 |
| Clarithromycin | 15 | 3.8 |
| Roxithromycin | 66 | 16.7 |
| Azithromycin | 148 | 37.4 |
| **Sulfonamides** | **39** | **9.8** |
| Sulfadiazine | 16 | 4.0 |
| Compound trimoxazole | 22 | 5.6 |
| **Quinolones** | **90** | **22.7** |
| Haloperinic acid | 28 | 7.1 |
| Ofloxacin | 58 | 14.6 |
| Ciprofloxacin | 18 | 4.5 |
| **Other** | **3** | **0.8** |
